# Supplementary material for: A Global Roll-out of Nationally Relevant Policies Bridges the Emissions Gap
Source: Research Square preprint supplement (doi:10.21203/rs.3.rs-126777/v1), 2021-01-19
Supplement: Supplementary file 1 [file 3202bef9132e53f0daecf393.xlsx]

## Sheet: Supplementary Table A 1
							high income countries (see 4th tab)		low/medium income countries (see 4th tab)		Other, see separate definition		Comment
Sector	Source	ID	Measure	Variable	Unit	value in base year	Value	Year	Value	Year	Value	year	General
Agriculture	Fekete	1a	Manure from livestock sector treated with anaerobic digesters	Emissions|CH4|Manure|Reduction relative to 2015	% relative to 2015	12.0 Mt CH4 in 2015 (IMAGE, Olivier & Peters, 2018)	33	2030	15	2030			Emissions reduction due to increasing application. Only required for countries with industrial cattle stables (not applied to free-roaming cows)
Agriculture	Fekete	1b	Manure from livestock sector treated with anaerobic digesters	Emissions|CH4|Manure|Reduction relative to 2015	% relative to 2015	12.0 Mt CH4 in 2015 (IMAGE, Olivier & Peters, 2018)	40	2050	33	2050			Emissions reduction due to increasing application. Only required for countries with industrial cattle stables (not applied to free-roaming cows)
Agriculture	Kriegler	2a	N-use efficiency increase	Emissions|N2O|Fertilizer|Reduction relative to 2015	% relative to 2015	1.91 Mt N2O in 2015 (IMAGE, Olivier & Peters, 2018)	10	2030	5	2030			Assuming the same yield
Agriculture	Kriegler	2b	N-use efficiency increase	Emissions|N2O|Fertilizer|Reduction relative to 2015	% relative to 2015	1.91 Mt N2O in 2015 (IMAGE, Olivier & Peters, 2018)			10	2050			Assuming the same yield
Agriculture	Höglund-Isaksson et al. (2018)	22	Selective breeding to reduce CH4 emissions from enteric fermentation - Emission factor reduction (CH4/tonne milk and/or beef) or emissions reduction	Emissions|CH4|Enteric fermentation|Reduction relative to 2015	% relative to 2015	109 Mt CH4 in 2015 (IMAGE, Olivier & Peters, 2018)	10	2030	0	2030			For dairy cows, this corresponds to an emission factor of 15.2 kg CH4 / kt milk.
Agriculture	PBL	24a	Proxy	Emissions|CH4|Agriculture|Reduction relative to 2015	% relative to 2015	156 Mt CH4 in 2015 (CEDS: Hoesly et al. 2018)	see tab 'indicators'
Agriculture	PBL	24b	Proxy	Emissions|N2O|Agriculture|Reduction relative to 2015	% relative to 2015	6.7 Mt N2O in 2015 (Olivier & Peters, 2018)
Agriculture	PBL	24c	Proxy	Emissions|Non-CO2|Agriculture|Reduction relative to 2015	% relative to 2015	See above
Buildings	Roelfsema	3a	Final energy efficiency improvement appliances compared to base year (=autonomous improvement + due to policy)	Final Energy|Appliances|Efficiency improvement relative to 2015	% relative to 2015	Is different for every appliance	17	2030	7	2025-2030			starting in 2018 for high income countries, 2025 for low/medium income
Buildings	Roelfsema	3b	Final energy efficiency improvement appliances compared to base year (=autonomous improvement + due to policy)	Final Energy|Appliances|Efficiency improvement relative to 2015	% relative to 2015	Is different for every appliance	32	2050	27	2030-2050			second period, with slower improvement
Buildings	Kriegler	4a	New residential buildings final energy intensity	Final Energy|Buildings|Residential|New|Intensity	kWh/m2	-	22	2025	22	2035	35	2025	Columns MN apply to EU
Buildings	Kriegler	4b	New commercial buildings final energy intensity	Final Energy|Buildings|Commerical|New|Intensity	kWh/m2	-	30	2025	30	2035	40	2025	Columns MN apply to EU
Buildings	PBL	4c	Different interpretation of 4a/b New buildings final energy intensity for residential/commercial buildings relative to baseline	Final Energy|Buildings|Residential and Commercial|New|Intensity|Reduction relative to baseline	% relative to baseline	-	60	2025	72	2030
Buildings	PBL	4d	Different interpretation of 4a/b New buildings final energy intensity for residential/commercial buildings relative to baseline	Final Energy|Buildings|Residential and Commercial|New|Intensity|Reduction relative to baseline	% relative to baseline	-	48	2030	60	2035			Retrofit is 45% efficiency improvement relative to reference (baseline) building
Buildings	Brainstorm	5a	No new oil boilers in new and existing commercial buildings	5a. New oil boiler capacity in new and existing commercial buildings	GW	-	0	2030	0	2040	0	2020	2020 (columns M&N) applies to EU. Boilers can also be used for water heating, not only space heating. New fossil boilers refer to newly installed boilers which use fossil energy (so newly purchased boilers).
Buildings	Brainstorm	5b	No new oil boilers in new and existing residential buildings	5b. New oil boiler capacity in new and existing residential buildings	GW	-	0	2030	0	2040	0	2020	2020 (columns M&N) applies to EU. Boilers can also be used for water heating, not only space heating. New fossil boilers refer to newly installed boilers which use fossil energy (so newly purchased boilers).
Buildings	Fekete	6a	Renovation rate of existing buildings	6a. Renovation rate existing buildings (efficiency improvement) - starting in 2018	%	NA	11	2030	6	2030			the percentage is the percentage of existing buildings that is renovated. We have not said anything about what renovation means. In Fekete et al. it was assumed that energy intensity was reduced by 45% relative to typical similar buildings (in TIMER global energy intensity for residential buildings is 516 GJ/m2 by 2015 and 450 GJ/m2 by 2030).
Buildings	Fekete	6b	Renovation rate of existing buildings	6b. Renovation rate existing buildings (efficiency improvement) - starting in 2018	%	NA	24	2050	14	2050			Retrofit is 45% efficiency improvement relative to reference (baseline) building
Buildings	PBL	25	Proxy	Emissions|CO2|Energy|Demand|Residential and Commercial|Reduction relative to 2015	% relative to 2015	-	see tab 'indicators'
Carbon pricing	Brainstorm	7	Carbon pricing (*0.5 for AFOLU)	Price|Carbon	$/t CO2	-	see separate tab	see separate tab	see separate tab	see separate tab	see separate tab	see separate tab	For all sectors (with lower price for AFOLU). OK not to include for 2025 if deemend irrelevant for a country. Minimum price. Pricing carbon, so could also be implemented via cap and trade
Energy Supply	Kriegler	8	No newly installed unabated coal (applies to electric, H2, synthetic fuel)	Capacity Additions|Electricity|Coal|w/o CCS	GW	-	0.0	2025	0.0	2030			2030 value for high income: still 0
Energy Supply	Roelfsema	9a	Renewable electricity share increase (including hydropower and biomass)	Secondary Energy|Electricity|Share of Renewables|Increase	%-point per year (starting in 2020)	-	1.4	2050	1.4	2050			Also apply to 2030: 2020 level + 1.4 * 10
Energy Supply	Brainstorm	9b	Up to a level of	Secondary Energy|Electricity|Share of Renewables	%	-	50.0		50.0				Differentiation is possible. As long as the global teams implement the same/similar level for a certain country as the country-modelling teams will implement.
F-gas	Brainstorm	10a	F-gas emission reduction	Emissions|F-Gases|Reductions relative to 2015	% relative to 2015	1.43 GtCO2 eq. (see comment)	60	2030	38	2030			if too rigid, go as low as possible
F-gas	Brainstorm	10b	F-gas emission reduction	Emissions|F-Gases|Reductions relative to 2015	% relative to 2015	1.43 GtCO2 eq. (see comment)	85	2035	85	2045
Fugitive emissions	Fekete	11	Coal mine CH4 emission recovery (underground mining only)	Emissions|CH4|Coal mines|Recovery	%	52.6 Mt CH4 from coal in 2015 (CEDS: Hoesly et al. 2018)	30	2030	30	2030			For emissions reduction, refer to the proxy. Only for countries where this is relevant
Fugitive emissions	Fekete	12a	Venting and flaring total CH4 and CO2 (added with GWP) emission reduction	Emissions|CH4+CO2|Venting and Flaring|Reduction relative to 2015	% relative to 2015	96.6 Mt CH4 from oil and gas in 2015 (CEDS: Hoesly et al. 2018)	36	2030	36	2030
Fugitive emissions	Fekete	12b	Venting and flaring total CH4 and CO2 (added with GWP) emission reduction	Emissions|CH4+CO2|Venting and Flaring|Reduction relative to 2015	% relative to 2015	96.6 Mt CH4 from oil and gas in 2015 (CEDS: Hoesly et al. 2018)	95	2050	95	2050
Energy Supply	PBL	26	Proxy	Emissions|CH4|Energy	% relative to 2015	149.22 Mt CH4 from energy (supply) in 2015 (CEDS: Hoesly et al. 2018)	see tab 'indicators'
Industry	Kriegler	13a	Carbon captured and stored: applied to all industry sectors (up to team to decide)	Carbon Sequestration|CCS|Industrial Processes	% of industry's total CO2 emissions	-			0	2030
Industry	Kriegler	13b	Carbon captured and stored: applied to all industry sectors (up to team to decide)	Carbon Sequestration|CCS|Industrial Processes	% of industry's total CO2 emissions	-	1.5	2030	1.5	2040			If CCS is allowed in the model then a lower value is possbile, as long as the global teams implement the same/similar value for the country as the country-model team
Industry	Kriegler	14a	Final energy efficiency improvement compared to base year (autonomous improvement + due to policy)	Final Energy|Efficiency Improvement|Relative to 2015	% relative to 2015	-	11	2030	6	2030
Industry	Kriegler	14b	Final energy efficiency improvement compared to base year (autonomous improvement + due to policy)	Final Energy|Efficiency Improvement|Relative to 2015	% relative to 2015	-	28	2050	15	2050
Industry	Fekete	15	N2O emissions from adipic/acid production: reduction	Emissions|N2O|Adipic/Acid Production|Reduction relative to 2015	% relative to 2015	0.60 Mt N2O from adipic acid in 2015 (IMAGE, Olivier & Peters, 2018)	99	2030	99	2030
LULUCF	Kriegler	16	Natural forest afforestation + reforestation rate	Land Cover|Forest|Afforestation and Reforestation	% Increase in forest area per year (starting in 2015)	-	see separate tab	see separate tab	see separate tab	see separate tab	see separate tab	see separate tab	Feel free to make this relevant for each country
LULUCF	Roelfsema	17	Natural forest deforestation rate	Land Cover|Forest|Deforestation	ha/year	-	0.00	2030	0.00	2030
LULUCF	Kriegler	27	Proxy	Emissions|CO2|LULUCF	% relative to 2015	-	see tab 'indicators'
Transport	Kriegler	18a	Aviation energy efficiency improvement	Final Energy|Transportation|Aviation|Effficiency Improvement	%/year (starting in 2018)	-	0.78	2030	0.78	2030
Transport	Kriegler	18b	Aviation energy efficiency improvement	Final Energy|Transportation|Aviation|Effficiency Improvement	%/year (starting in 2018)	-	0.52	2050	0.52	2050
Transport	Roelfsema	19a	New passenger car average fuel efficiency (fossil)	Final Energy|Transportation|Passenger|New Fossil Cars|Fuel Efficiency	km/l	-	38	2030	27	2030			to add a footnote on countries with congestion, where it might not be achieved in reality
Transport	Roelfsema	19b	(different interpretation of 19a) New passenger car average fuel efficiency (fossil) (same as the km/l policy)	Final Energy|Transportation|Passenger|New Fossil Cars|Fuel Efficiency	gCO2/km	-	61	2030	86	2030
Transport	PBL	19c	(different interpretation of 19a) Final energy for cars relative to baseline - based on PBL runs	Final Energy|Transportation|Passenger|New Fossil Cars|Reduction relative to baseline	% relative to baseline	-	25	2030	20	2040
Transport	Kriegler	20	Share target for non-fossil (hydrogen + electric) in new vehicle sales (including two-wheelers)	Vehicle sales|Hydrogen and Electric|Share	% of new sales	-	50	2030	25	2030	25	2025	Here, the other category (columns J-K) refer to China specifically. A news message states that China is raising its 2025 target for “New Energy Vehicles” to 25% of new sales. This includes “all-electric, fuel-celled autos and plug-in hybrids”. https://www.bloomberg.com/news/articles/2019-12-03/china-raises-2025-sales-target-for-electrified-cars-to-about-25
Waste	Fekete	21a	waste CH4 emissions reduction	Emissions|CH4|Waste|Reduction relative to 2015	% relative to 2015	In 2015: Landfills 32.8 Mt CH4, Sewage 26.9 Mt CH4 (IMAGE, CEDS: Hoesly et al. 2018)			28	2030
Waste	Fekete	21b	waste CH4 emissions reduction	Emissions|CH4|Waste|Reduction relative to 2015	% relative to 2015	In 2015: Landfills 32.8 Mt CH4, Sewage 26.9 Mt CH4 (IMAGE, CEDS: Hoesly et al. 2018)	55	2030	55	2040

## Sheet: indicators
			World			high income			low/medium income
Total GHG emissions			Percentage change in total GHG emissions between 2015 and 2030
Variable	Sector	Sub-sector	CurPol	GPP	GPP_notax	CurPol	GPP	GPP_notax	CurPol	GPP	GPP_notax
Emissions|Kyoto Gases	Economy wide	total	0.212447	0.0698377	0.0660411	-0.14976	-0.29932	-0.289478	0.366833	0.227065	0.217457
	Energy Supply	total	0.211483	-0.0805328	-0.0849473	-0.0737669	-0.321158	-0.313908	0.34099	0.027697	0.0180318
		power generation	0.280794	0.00207649	-0.00210512	-0.0449017	-0.302367	-0.29384	0.44342	0.15287	0.142386
		losses/leakages	0.087149	-0.389538	-0.395721	-0.101959	-0.470916	-0.468866	0.134744	-0.369358	-0.377583
	Transport	total	-0.123471	-0.179936	-0.1638	-0.482828	-0.526496	-0.513458	0.273153	0.202761	0.222319
		cars	-0.333663	-0.440295	-0.429896	-0.617972	-0.693709	-0.685112	0.115855	-0.0396233	-0.0263754
		air	0.129363	0.108941	0.129643	-0.27765	-0.291506	-0.274224	0.696417	0.666845	0.692313
	Buildings	total	0.141783	0.0682724	0.0976499	-0.0570135	-0.142322	-0.111279	0.358039	0.29767	0.325234
		- residential	0.0941647	-0.00181055	0.0206351	-0.0884992	-0.214097	-0.190856	0.268105	0.200715	0.222402
		- commercial	0.238709	0.21079	0.254264	-0.00391671	-0.0212808	0.0229177	0.586037	0.543022	0.585459
	Industry	total	0.0820606	0.0205983	-0.0190014	-0.0591866	-0.172197	-0.16951	0.12406	0.0779046	0.0257355
		- adipic acid	0.207572	0.178448	0.1206	0.0688494	0.0392429	-0.00786063	0.397219	0.368748	0.296213
	F-gases	total	0.583795	0.0381142	0.0615897	-0.209073	-0.513266	-0.510573	1.62241	0.760395	0.811095
	Agriculture	total non-CO2	0.0198174	0.119329	0.119329	-0.10534	-0.00748421	-0.00748421	0.0514316	0.151247	0.151247
		- CH4	-0.0202432	0.0957256	0.0957256	-0.136083	-0.0327805	-0.0327805	0.009518	0.128599	0.128599
		- N2O	0.101347	0.166907	0.166907	-0.040115	0.0455625	0.0455625	0.135848	0.196452	0.196452
		- animal waste	0.035697	-0.141092	-0.141092	-0.0219881	-0.260752	-0.260752	0.0896642	-0.0291447	-0.0291447
		- fertilizer (direct+indirect)	0.153102	0.22655	0.0670722	-0.035618	0.0470451	0.0417887	0.202781	0.27379	0.0691126
	LULUCF	total	1.19984	1.27686	1.27686	-0.465488	-0.483401	-0.483401	1.05481	1.12289	1.12289
	Waste	total	0.0599383	-0.196513	-0.196513	-0.155991	-0.417548	-0.417548	0.139503	-0.115067	-0.115067
			Absolute change in total GHG emissions between 2015 and 2030
	Industry	total	704.498	176.888	-163.174	-116.459	-338.825	-333.538	820.958	515.716	170.365
		- CO2 captured	0	97.1281	0	0	96.9181	0	0	0.210013	0
			World			high income			low/medium income
Total energy use			Percentage change in total energy use between 2015 and 2030
Variable	Sector	Sub-sector	CurPol	GPP	GPP_notax	CurPol	GPP	GPP_notax	CurPol	GPP	GPP_notax
Final Energy	Economy wide	total	0.188519	0.135661	0.127327	-0.0179214	-0.0783679	-0.0722196	0.319117	0.271044	0.25355
		- renewable	1.55497	2.04553	2.02266	1.68613	1.8925	1.90019	1.45985	2.15745	2.11223
Secondary Energy|Electricity	Energy Supply	total	0.49804	0.456607	2.49872	0.143808	0.139482	2.29915	0.772035	0.701895	2.61404
		- renewable	0.996123	1.71068	1.68281	0.729803	1.17957	1.17589	1.19626	2.11426	2.06801
Final Energy|Transport	Transport	total	0.169208	0.110172	0.129398	-0.165998	-0.222075	-0.205298	0.547485	0.485285	0.507275
		- cars	-0.0837247	-0.186534	-0.17312	-0.346463	-0.429477	-0.417747	0.352403	0.216999	0.233209
		- air	0.244205	0.113112	0.134223	-0.165678	-0.255061	-0.236852	0.815074	0.626053	0.651206
Final Energy|Residential and Commercial	Buildings	total	0.180764	0.105643	0.125518	0.0397433	-0.0433771	-0.016293	0.284754	0.215532	0.230091
		- residential	0.0827382	-0.00511385	0.00591671	-0.0360222	-0.152048	-0.133339	0.145749	0.0728514	0.0798079
		- appliances	0.562095	0.538581	0.538581	0.207662	0.172586	0.172586	1.07856	1.07172	1.07172
		- heating	0.134733	0.0148367	0.0405723	-0.0850227	-0.223204	-0.198635	0.426232	0.330569	0.357851
		- cooling	1.19373	0.542389	0.549111	0.217219	-0.113564	-0.0987935	1.50778	0.753346	0.75748
		- commercial	0.430251	0.387501	0.429883	0.147142	0.110673	0.14963	0.896899	0.843671	0.891699
Final Energy|Industry	Industry	total	0.195239	0.169283	0.106688	0.0725406	0.0442813	-0.00511985	0.238318	0.213152	0.145927

## Sheet: 7. CarbonPrice
Based on:									USA: start here	Bridge scenario: converge from these 2030 prices to your 2C-consistent carbon tax in 2050				GPP scenario
model	scenario	region	variable	unit	2005	2010	2015	2020	2025	2030	2035	2040	2045	2050	2055	2060	2065	2070	2075	2080	2085	2090	2095	2100
REMIND-MAgPIE 1.7-3.0	PEP_2C_full_goodpractice	tier 1	Price|Carbon|minimum	US$2010/t CO2				10	25	40	50	60	70	80	90	100	110	120	130	140	150	160	170	180
REMIND-MAgPIE 1.7-3.0	PEP_2C_full_goodpractice	tier 2	Price|Carbon|minimum	US$2010/t CO2					10	25	35	45	55	65	75	85	95	105	115	125	135	145	155	165
REMIND-MAgPIE 1.7-3.0	PEP_2C_full_goodpractice	tier 3	Price|Carbon|minimum	US$2010/t CO2					5	10	20	30	40	50	60	70	80	90	100	110	120	130	140	150
			spread tier1/tier3						5	4	2.5	2	1.75	1.6	1.5	1.42857	1.375	1.33333	1.3	1.27273	1.25	1.23077	1.21429	1.2
Definition of tiers:
tier 1	R5_OECD+EU as in https://data.ene.iiasa.ac.at/iamc-1.5c-explorer/#/docs - but USA starts in 2025 (i.e. skip 2020 carbon price for USA)
tier 2	Russia, Eastern Europe, + China, Korea, LAM
tier 3	all others

## Sheet: 16. Afforestation
Variable	Unit	Period	Tier 1	Tier 2	Tier 3
16. Natural forest afforestation + reforestation rate	% Increase in forest area per year	2015-2030	2	1	0.5
Definition of Tiers:
Tier 1
China
LAM
Tier 2
South and South East Asia (including India)
Sub-Saharan Africa
Australia
Tier 3
Europe (including Turkey and 23% of Russia)	Part of Russia excluded due to albedo feedback
USA

## Sheet: country categorisation
Country	ISO Code	status		https://models.pbl.nl/image/index.php/Region_classification_map
AFGHANISTAN	AFG	low/medium income		IMAGE Region	Type
ALBANIA	ALB	low/medium income		Canada	high income
ALGERIA	DZA	low/medium income		USA	high income
AMERICAN SAMOA	ASM	low/medium income		Mexico	low/medium income
ANDORRA	AND	high income		Rest Central America	low/medium income
ANGOLA	AGO	low/medium income		Brazil	low/medium income
ANGUILLA	AIA	#N/A		Rest South America	low/medium income
ANTARCTICA	ATA	#N/A		Northern Africa	low/medium income
ANTIGUA AND BARBUDA	ATG	high income		Western Africa	low/medium income
ARGENTINA	ARG	low/medium income		Eastern Africa	low/medium income
ARMENIA	ARM	low/medium income		South Africa	low/medium income
ARUBA	ABW	low/medium income		Western Europe	high income
AUSTRALIA	AUS	high income		Central Europe	high income
AUSTRIA	AUT	high income		Turkey	low/medium income
AZERBAIJAN	AZE	low/medium income		Ukraine	low/medium income
BAHAMAS	BHS	low/medium income		Asia-Stan	low/medium income
BAHRAIN	BHR	high income		Russia+	low/medium income
BANGLADESH	BGD	low/medium income		Middle East	low/medium income
BARBADOS	BRB	low/medium income		India	low/medium income
BELARUS	BLR	low/medium income		Korea	high income
BELGIUM	BEL	high income		China+	low/medium income
BELIZE	BLZ	low/medium income		SouthEastern Asia	low/medium income
BENIN	BEN	low/medium income		Indonesia+	low/medium income
BERMUDA	BMU	low/medium income		Japan	high income
BHUTAN	BTN	low/medium income		Oceania	high income
BOLIVIA	BOL	low/medium income		Rest of South Asia	low/medium income
BOSNIA AND HERZEGOVINA	BIH	low/medium income		Rest of Southern Africa	low/medium income
BOTSWANA	BWA	low/medium income
BOUVET ISLAND	BVT	#N/A
BRAZIL	BRA	low/medium income
BRITISH INDIAN OCEAN TERRITORY	IOT	#N/A
BRUNEI DARUSSALAM	BRN	high income
BULGARIA	BGR	low/medium income
BURKINA FASO	BFA	low/medium income
BURUNDI	BDI	low/medium income
CAMBODIA	KHM	low/medium income
CAMEROON	CMR	low/medium income
CANADA	CAN	high income
CAPE VERDE	CPV	low/medium income
CAYMAN ISLANDS	CYM	low/medium income
CENTRAL AFRICAN REPUBLIC	CAF	low/medium income
CHAD	TCD	low/medium income
CHILE	CHL	high income
CHINA	CHN	low/medium income
CHRISTMAS ISLAND	CXR	#N/A
COCOS (KEELING) ISLANDS	CCK	#N/A
COLOMBIA	COL	low/medium income
COMOROS	COM	low/medium income
CONGO	COG	low/medium income
CONGO, THE DEMOCRATIC REPUBLIC OF THE	COD	low/medium income
COOK ISLANDS	COK	#N/A
COSTA RICA	CRI	low/medium income
CÔTE D'IVOIRE	CIV	low/medium income
CROATIA	HRV	high income
CUBA	CUB	low/medium income
CYPRUS	CYP	high income
CZECH REPUBLIC	CZE	high income
DENMARK	DNK	high income
DJIBOUTI	DJI	low/medium income
DOMINICA	DMA	low/medium income
DOMINICAN REPUBLIC	DOM	low/medium income
EAST TIMOR	TLS	low/medium income
ECUADOR	ECU	low/medium income
EGYPT	EGY	low/medium income
EL SALVADOR	SLV	low/medium income
EQUATORIAL GUINEA	GNQ	low/medium income
ERITREA	ERI	low/medium income
ESTONIA	EST	high income
ETHIOPIA	ETH	low/medium income
FALKLANDS ISLANDS (MALVINAS)	FLK	#N/A
FAROE ISLANDS	FRO	low/medium income
FIJI	FJI	low/medium income
FINLAND	FIN	high income
FRANCE	FRA	high income
FRENCH GUIANA	GUF	#N/A
FRENCH POLYNESIA	PYF	low/medium income
FRENCH SOUTHERN TERRITORIES	ATF	#N/A
GABON	GAB	low/medium income
GAMBIA	GMB	low/medium income
GEORGIA	GEO	low/medium income
GERMANY	DEU	high income
GHANA	GHA	low/medium income
GIBRALTAR	GIB	low/medium income
GREECE	GRC	high income
GREENLAND	GRL	low/medium income
GRENADA	GRD	low/medium income
GUADELOUPE	GLP	#N/A
GUAM	GUM	low/medium income
GUATEMALA	GTM	low/medium income
GUINEA	GIN	low/medium income
GUINEA-BISSAU	GNB	low/medium income
GUYANA	GUY	low/medium income
HAITI	HTI	low/medium income
HEARD ISLAND AND MCDONALD ISLANDS	HMD	#N/A
HOLY SEE (VATICAN CITY STATE)	VAT	#N/A
HONDURAS	HND	low/medium income
HONG KONG	HKG	high income
HUNGARY	HUN	high income
ICELAND	ISL	high income
INDIA	IND	low/medium income
INDONESIA	IDN	low/medium income
IRAN, ISLAMIC REPUBLIC OF	IRN	low/medium income
IRAQ	IRQ	low/medium income
IRELAND	IRL	high income
ISRAEL	ISR	high income
ITALY	ITA	high income
JAMAICA	JAM	low/medium income
JAPAN	JPN	high income
JORDAN	JOR	low/medium income
KAZAKSTAN	KAZ	low/medium income
KENYA	KEN	low/medium income
KIRIBATI	KIR	low/medium income
KOREA, DEMOCRATIC PEOPLE'S REPUBLIC OF	PRK	low/medium income
KOREA, REPUBLIC OF	KOR	high income
KUWAIT	KWT	high income
KYRGYZSTAN	KGZ	low/medium income
LAO PEOPLE'S DEMOCRATIC REPUBLIC	LAO	low/medium income
LATVIA	LVA	high income
LEBANON	LBN	low/medium income
LESOTHO	LSO	low/medium income
LIBERIA	LBR	low/medium income
LIBYAN ARAB JAMAHIRIYA	LBY	low/medium income
LIECHTENSTEIN	LIE	low/medium income
LITHUANIA	LTU	high income
LUXEMBOURG	LUX	high income
MACAU	MAC	high income
MACEDONIA, THE FORMER YUGOSLAV REPUBLIC OF	MKD	low/medium income
MADAGASCAR	MDG	low/medium income
MALAWI	MWI	low/medium income
MALAYSIA	MYS	low/medium income
MALDIVES	MDV	low/medium income
MALI	MLI	low/medium income
MALTA	MLT	high income
MARSHALL ISLANDS	MHL	low/medium income
MARTINIQUE	MTQ	#N/A
MAURITANIA	MRT	low/medium income
MAURITIUS	MUS	low/medium income
MAYOTTE	MYT	#N/A
MEXICO	MEX	low/medium income
MICRONESIA, FEDERATED STATES OF	FSM	low/medium income
MOLDOVA, REPUBLIC OF	MDA	low/medium income
MONACO	MCO	low/medium income
MONGOLIA	MNG	low/medium income
MONTENEGRO	MNE	low/medium income
MONTSERRAT	MSR	#N/A
MOROCCO	MAR	low/medium income
MOZAMBIQUE	MOZ	low/medium income
MYANMAR	MMR	low/medium income
NAMIBIA	NAM	low/medium income
NAURU	NRU	low/medium income
NEPAL	NPL	low/medium income
NETHERLANDS	NLD	high income
NETHERLANDS ANTILLES	ANT	#N/A
NEW CALEDONIA	NCL	low/medium income
NEW ZEALAND	NZL	high income
NICARAGUA	NIC	low/medium income
NIGER	NER	low/medium income
NIGERIA	NGA	low/medium income
NIUE	NIU	#N/A
NORFOLK ISLAND	NFK	#N/A
NORTHERN MARIANA ISLANDS	MNP	low/medium income
NORWAY	NOR	high income
OMAN	OMN	high income
PAKISTAN	PAK	low/medium income
PALAU	PLW	high income
PANAMA	PAN	high income
PAPUA NEW GUINEA	PNG	low/medium income
PARAGUAY	PRY	low/medium income
PERU	PER	low/medium income
PHILIPPINES	PHL	low/medium income
PITCAIRN	PCN	#N/A
POLAND	POL	high income
PORTUGAL	PRT	high income
PUERTO RICO	PRI	high income
QATAR	QAT	high income
RÉUNION	REU	#N/A
ROMANIA	ROU	low/medium income
RUSSIAN FEDERATION	RUS	low/medium income
RWANDA	RWA	low/medium income
SAINT HELENA	SHN	#N/A
SAINT KITTS AND NEVIS	KNA	high income
SAINT LUCIA	LCA	low/medium income
SAINT PIERRE AND MIQUELON	SPM	#N/A
SAINT VINCENT AND THE GRENADINES	VCT	low/medium income
SAMOA	WSM	low/medium income
SAN MARINO	SMR	low/medium income
SAO TOME AND PRINCIPE	STP	low/medium income
SAUDI ARABIA	SAU	high income
SENEGAL	SEN	low/medium income
SERBIA	SRB	low/medium income
SEYCHELLES	SYC	high income
SIERRA LEONE	SLE	low/medium income
SINGAPORE	SGP	high income
SLOVAKIA	SVK	high income
SLOVENIA	SVN	high income
SOLOMON ISLANDS	SLB	low/medium income
SOMALIA	SOM	low/medium income
SOUTH AFRICA	ZAF	low/medium income
SOUTH GEORGIA AND THE SOUTH SANDWICH ISLANDS	SGS	#N/A
SPAIN	ESP	high income
SRI LANKA	LKA	low/medium income
SUDAN	SDN	low/medium income
SURINAME	SUR	low/medium income
SVALBARD AND JAN MAYEN	SJM	#N/A
SWAZILAND	SWZ	low/medium income
SWEDEN	SWE	high income
SWITZERLAND	CHE	high income
SYRIAN ARAB REPUBLIC	SYR	low/medium income
TAIWAN, PROVINCE OF CHINA	TWN	#N/A
TAJIKISTAN	TJK	low/medium income
TANZANIA, UNITED REPUBLIC OF	TZA	low/medium income
THAILAND	THA	low/medium income
TOGO	TGO	low/medium income
TOKELAU	TKL	#N/A
TONGA	TON	low/medium income
TRINIDAD AND TOBAGO	TTO	high income
TUNISIA	TUN	low/medium income
TURKEY	TUR	low/medium income
TURKMENISTAN	TKM	low/medium income
TURKS AND CAICOS ISLANDS	TCA	high income
TUVALU	TUV	low/medium income
UGANDA	UGA	low/medium income
UKRAINE	UKR	low/medium income
UNITED ARAB EMIRATES	ARE	high income
UNITED KINGDOM	GBR	high income
UNITED STATES	USA	high income
UNITED STATES MINOR OUTLYING ISLANDS	UMI	#N/A
URUGUAY	URY	high income
UZBEKISTAN	UZB	low/medium income
VANUATU	VUT	low/medium income
VENEZUELA	VEN	low/medium income
VIET NAM	VNM	low/medium income
VIRGIN ISLANDS, BRITISH	VGB	low/medium income
VIRGIN ISLANDS, U.S.	VIR	low/medium income
WALLIS AND FUTUNA	WLF	#N/A
WESTERN SAHARA	ESH	#N/A
YEMEN	YEM	low/medium income
ZAMBIA	ZMB	low/medium income
ZIMBABWE	ZWE	low/medium income
